# Supplementary material
Source: publisher figshare collection journal article supplement (https://tandf.figshare.com/ndownloader/files/21385149)
Supplement: Supplementary file 1 [file 21385149]

## Sheet: Sheet1
patient	sex	age	IC #	Year IC	cancer	TSH 0	TSH 1	TSH 6	FT4 0	FT4 1	FT4 6	FT3 0	FT3 1	FT3 6	ANTITPO 0	ANTITPO 1	ANTITPO 6	TRAS 0	TRAS 1	TRAS 6
1	0	70	2	3	1	1.53	2.41	0.49	10.9	12.8	15.4	4.9	5.5	5.2	10	10	10	0.9	0.9	0.9
2	0	50	1		1	0.84	1.57	0.58	15.4	12.4	15.4	5.4	4.7	5.1	10	10	10	0.9	0.9	0.9
3	0	62	13	8	1	0.5	1.66	1.52	12.5	13	14.9	3.7	4.7	5	20	10	10	0.9	0.9	0.9
4	0	70	17	5	1	3.66	3.69	3.4	13.8	13.6	12.2	5.1	3.2	3.8	131	124	105	0.9	0.9	0.9
5	0	69	29	5	1	1.38	1.12	0.76	11.9	13.3	13.2	3.8	4.1	4.2	12	17	12	0.9	0.9	0.9
6	0	62	12	5	1	2.64	4.15	2.11	11.9	11.2	12.9	5.6	4.9	4.8	10	10	10	0.9	0.9	0.9
7	0	61	5	3	1	2.55	4.2	1.61	15.7	14.5	13.9	4	3.8	3.4	24	23	20	0.9	0.9	0.9
8	0	66	5	2	1	1.08	1.69	0.77	12.3	12.9	11.4	4.6	4.5	4.5	186	207	246	0.9	0.9	0.9
9	0	62	13	16	1	0.87	2.89	0.97	16.8	17.2	17.8	3.7	5.2	4.4	10	10	10	2.1	2.2	2.3
10	0	62	2	1	1	2.4	1.94	1.69	13.5	12.2	12.3	4.3	3.4	4.5	10	10	10	0.9	0.9	0.9
11	0	71	1		0	1.74	1.76	1.21	16.7	17	16.2	5	5.4	5	10	10	10	0.9	0.9	0.9
12	0	27	30	10	1	2.04	2.54	1.47	14.6	14.8	14.7	4.8	4.8	4.7	10	10	10	0.9	0.9	0.9
13	0	64	1		1	2.6	5.2	2.42	14.4	3.3	3.9	4	3.9	3.3	10	10	10	0.9	0.9	0.9
14	0	70	1		0	2.22	2.32	1.61	12.6	12.6	11.6	4.1	4.5	4	10	10	10	0.9	0.9	0.9
15	0	79	18	5	1	2.35	2.38	1.38	17.5	15.4	16.9	4.8	5	5.1	10	10	10	1.1	0.9	0.9
16	0	58	17	2	1	1.04	1.5	0.69	14.5	12.3	15.3	5.2	5.6	5	10	10	10	0.9	0.9	0.9
17	0	56	4	2	1	1.02	2.99	1.15	12.7	14.8	14.7	4.7	5.9	6	23	25	16	0.9	0.9	0.9
18	0	51	20	5	1	3.43	2.45	1.66	15.1	17.8	17.1	4.6	6.2	5.3	20	10	10	0.9	0.9	0.9
19	0	62	8	7	1	0.8	0.48	0.68	14.5	13	15.3	5.6	3.7	1.9	10	10	10	0.9	0.9
20	0	68	16	13	1	7.89	13.34		11.6	9.2		5.1	4.4		519	473		0.9	0.9
21	0	64	13	5	1	8.86	6	2.89	12.9	12.8	13	5.2	5.2	1.8	12	10	10	0.9	0.9	0.9
22	1	55	21	8	1	0.03	0.03	0.03	19.3	16.9	14.4	4			16			0.9
23	1	72	14	3	1	1.08	0.9	0.63	16.2	15.1	14.8	4.1	3.9	4.2	15	21	16	0.9	1	0.9
24	1	55	1		0	1.41	0.78	1.13	14.1	15.6	13.4	5.6	4	5.2	10	10	10	0.9	0.9	0.9
25	1	47	1		0	2.32	6.12	2.87	14.6	11.6	14	1.5	3.5	4.4	10	10	10	0.9	0.9	0.9
26	1	74	2	3	1	1.84	2.19	1.26	18.1	16.1	18	4.8	4	4.3	10	10	10	0.9	0.9	0.9
27	1	62	4	3	1	2.27	2.65	2.47	16.7	14.4	16.9	5.4	4.6	4.8	10	10	10	0.9	0.9	0.9
28	1	55	6	4	1	1.45	1.6	0.85	11.5	11.3	10.5	4.1	3.8	4.3	10	10	10	0.9	0.9	0.9
29	1	64	15	2	1	1.23	2.8	0.94	13.4	12.2	14.4	6.2	5.8	4.7	10	15	10	0.9	0.9	0.9
30	1	70	3	6	1	1.63	3.92	1.3	13.8	12.7	13.4	4.3	3.9	4.1	10	10	12	0.9	0.9	0.9
31	1	66	1		0	1.86	2.14	2.5	12.9	12	14.7	5.3	5.5	6.1	10	20	10	0.9	0.9	0.9
32	1	38	1		0	1.93	2.11	1.2	14.5	14	13.6	5	4.4	4.1	10	10	10	0.9	0.9	0.9
33	1	62	7	2	1	0.89	1.69	1.17	13	12.6	13.8	4.5	5.2	5.1	10	10	10	0.9	0.9	0.9
34	1	41	4	4	1	1.52	2.89	1.76	12.1	11.9	12.7	3.9	4.6	4.3	10	10	10	0.9	0.9	0.9
35	1	43	2	2	0	2.76	3.38	1.7	12.4	11.4	12.4	5.2	4.8	4.5		10	10	0.9	0.9	0.9
36	1	58	2	7	0	0.58	1.01	0.48	13.6	12.5	13.7	4.2	4.8	5	10	10	10		0.9	0.9
37	1	60	20	7	1	1.84	1.92		15.1	13.6		5	4.6		10	12		0.9	0.9
38	1	58	21	3	1	0.88	0.53	0.16	13.6	16.6	17	5.2	5.9	6.4	10	10	10	0.9	0.9	0.9
39	1	58	40	12	1	1.57	2.6	1.28	14.1	12.6	13.5	4.9	3.8	4.9	10	10	10	0.9	0.9	0.9
40	1	62	3	8	0	5.16	9.8		13.4	11.5		4	3.8		10	10		0.9	0.9
